# Supplementary material
Source: PubMed Central journal article supplement (PMC4220157)
Supplement: cr2014132x1.pdf [file cr2014132x1.pdf]

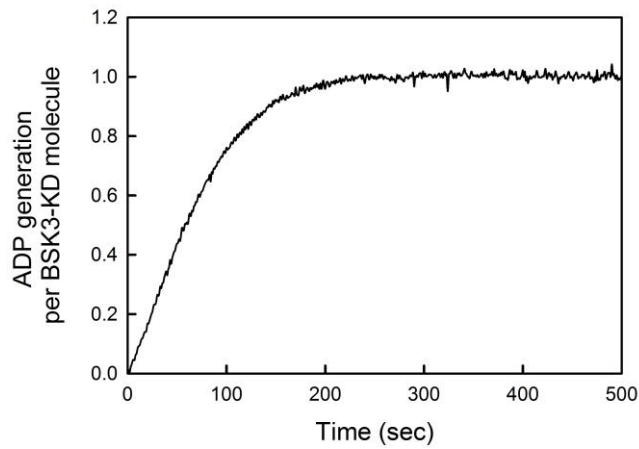

**Supplementary information, Figure S1** Time course of BRI1-CD-catalyzed BSK3-KD phosphorylation. Related to Figure 1.

The kinase assay was the same as in Figure 1D, except that the original absorbance change was converted to the generation of ADP per BSK3-KD molecule. Quantitation of ADP generation during BSK3-KD phosphorylation was determined using the extinction coefficient of  $6220 \text{ M}^{-1} \text{ cm}^{-1}$  for the enzyme-coupled reaction at 340 nm at pH 7.0.
