# Supplementary material
Source: PubMed Central journal article supplement (PMC4220157)
Supplement: cr2014132x4.pdf [file cr2014132x4.pdf]

**Supplementary information, Table S1** Kinetic parameters for BSK3-KD

phosphorylation by BRI1 fragments. Related to Figure 2

|                       | $k_{cat}$ (s <sup>-1</sup> ) | $K_m$ (μM)   | $k_{cat}/K_m$ (M <sup>-1</sup> s <sup>-1</sup> ) |
|-----------------------|------------------------------|--------------|--------------------------------------------------|
| BRI1-CD (815-1196)    | 4.23 ± 0.23                  | 25.92 ± 3.70 | 1.63 × 10 <sup>5</sup>                           |
| BRI1-JM-KD (815-1162) | 4.67 ± 0.24                  | 29.55 ± 4.04 | 1.58 × 10 <sup>5</sup>                           |
| BRI1-KD (863-1162)    | 5.26 ± 0.22                  | 44.42 ± 4.26 | 1.18 × 10 <sup>5</sup>                           |
