# Supplementary material
Source: PubMed Central journal article supplement (PMC4220157)
Supplement: cr2014132x5.pdf [file cr2014132x5.pdf]

**Supplementary information, Table S2** Refinement statistics for BRI1-KD using diffraction data (4OAC.cif) downloaded from PDB. Related to Figure 6.

| <b>BRI1-KD</b>                      |             |
|-------------------------------------|-------------|
| <b>Refinement</b>                   |             |
| Resolution (Å)                      | 44.59-1.98  |
| No. reflections                     | 26902       |
| $R_{work}/R_{free}$ (%)             | 21.90/24.79 |
| Number. atoms                       |             |
| Protein                             | 2272        |
| Ligand/ion                          | 27          |
| Water                               | 21          |
| Average B-factors (Å <sup>2</sup> ) | 78.27       |
| Rmsds                               |             |
| Bond lengths (Å)                    | 0.009       |
| Bond angles (°)                     | 1.297       |
